# Supplementary material for: A clinical transcriptome approach to patient stratification and therapy selection in acute myeloid leukemia
Source: PubMed Central journal article supplement (PMC8087683; doi:10.1038/s41467-021-22625-y), 2021-04-30
Supplement: 41467_2021_22625_MOESM1_ESM.pdf [file 41467_2021_22625_MOESM1_ESM.pdf]

1 **Supplementary Information**

2

3 **Supplementary Figures**

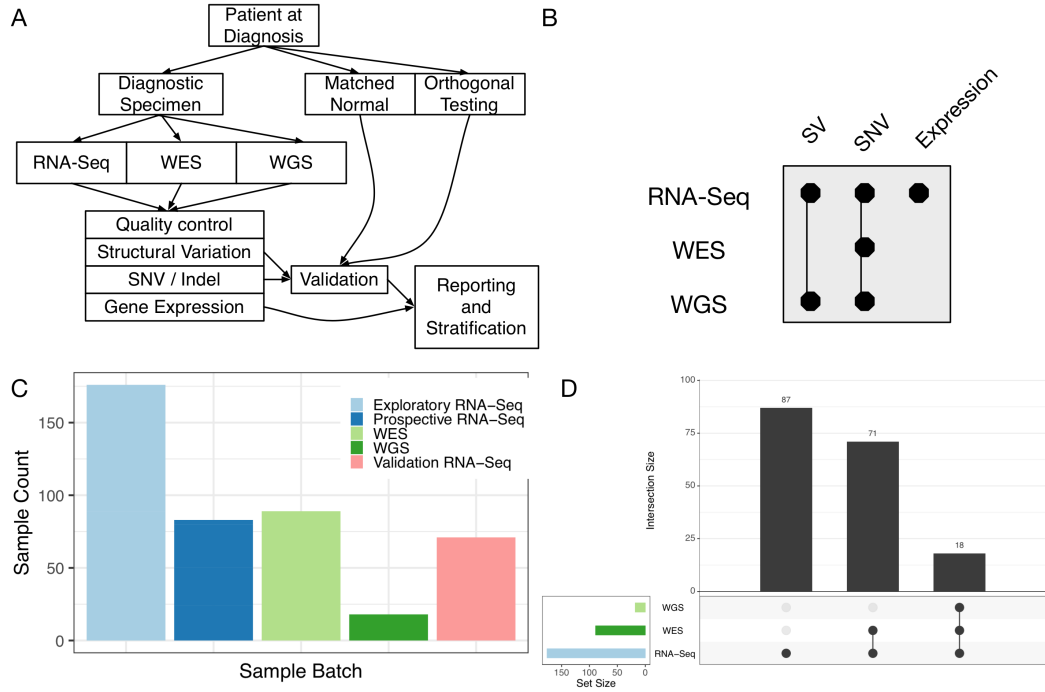

4

5 **Supplementary Figure 1.** Experimental design overview. **(A)** Experimental workflow

6 for the exploratory RNA-Seq, WES, and WGS libraries. Diagnostic tumour specimens

7 were obtained for each patient, with matched normal material used to validate selected

8 somatic SNV and short indel alterations. **(B)** Informatic analyses performed for each

9 sequencing platform. SV: structural variation, SNV: single nucleotide variant. **(C)**

10 Sample count by project batch and sequencing platform. **(D)** Patient samples with

11 matched RNA-Seq, WES, and WGS libraries in the exploratory cohort.

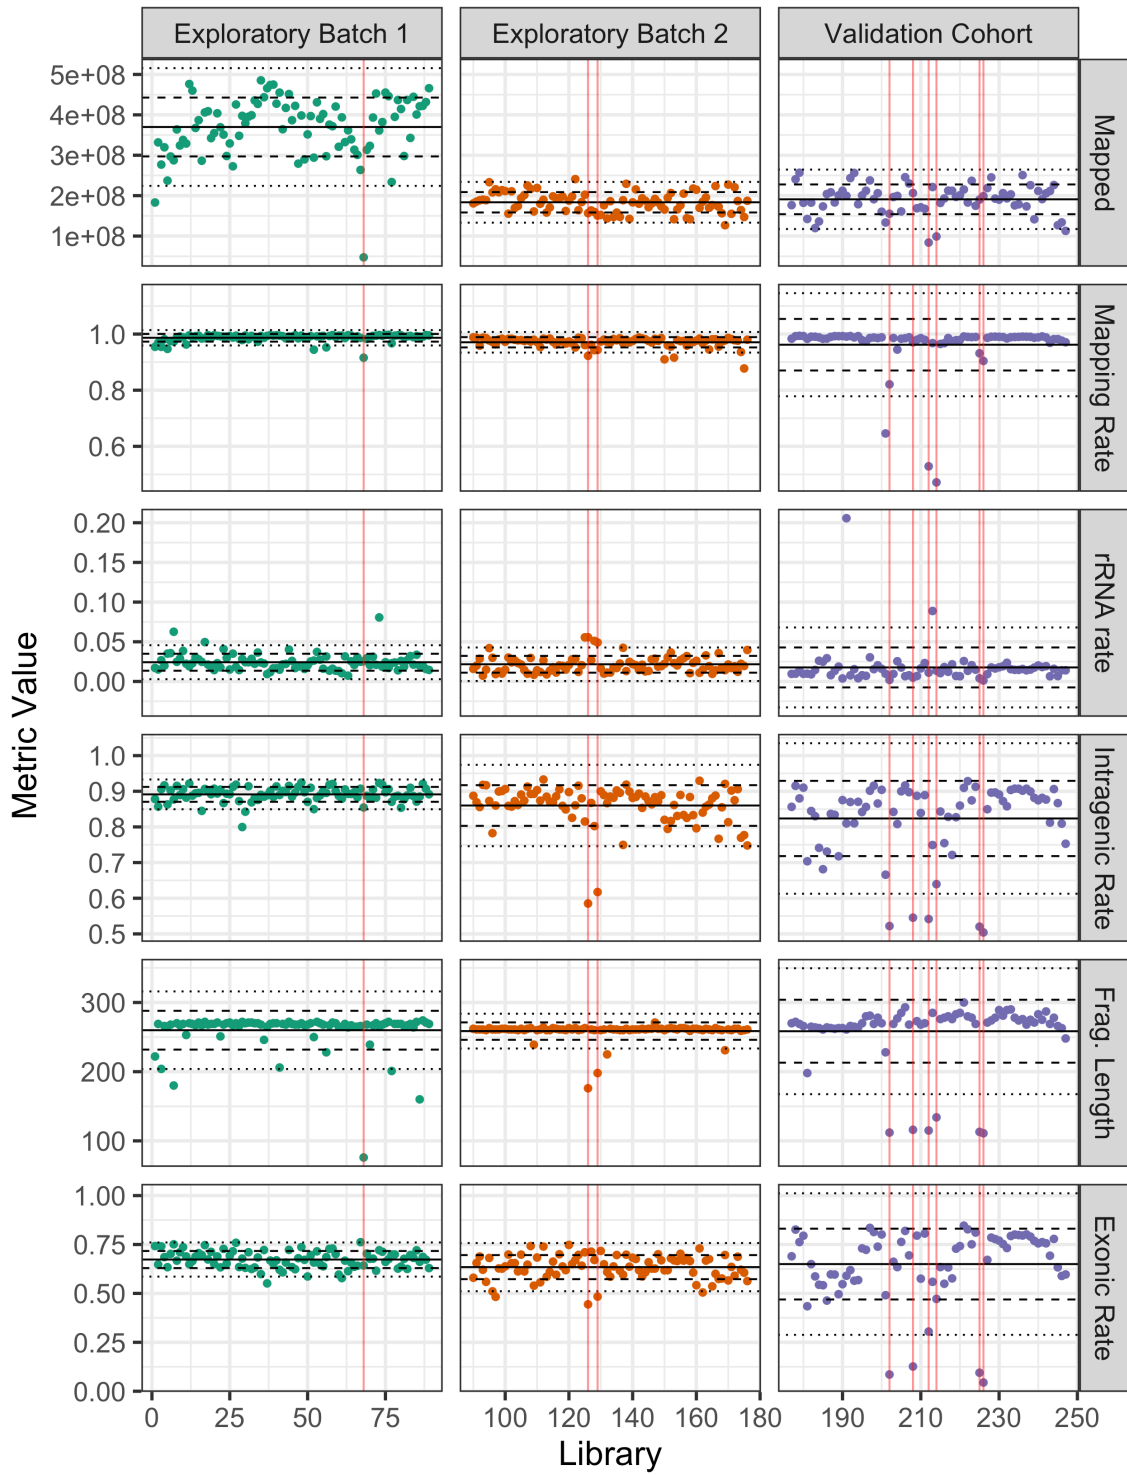

14 **Supplementary Figure 2.** Levey-Jennings quality control charts for selected quality  
15 metrics for RNA-Seq libraries from the AML PMP. In each panel, the x-axis represents  
16 the sample number within the project, while y-axis represents a distinct quality metric.  
17 The solid horizontal line represents the mean value for each metric within each  
18 sequencing batch, while the dashed and dotted lines represent one and two standard  
19 deviations away from the mean, respectively. ‘Mapped’: total number of mapped reads.  
20 ‘Mapping Rate’: proportion of total reads which were mapped to the reference genome.  
21 ‘rRNA rate’: proportion of reads originating from rRNAs. ‘Intragenic rate’: proportion of  
22 reads that map within genes. ‘Fragment length’: mean observed fragment length. ‘Exonic  
23 rate’: proportion of reads mapping within exons. Failed samples are indicated with red  
24 vertical lines.

25

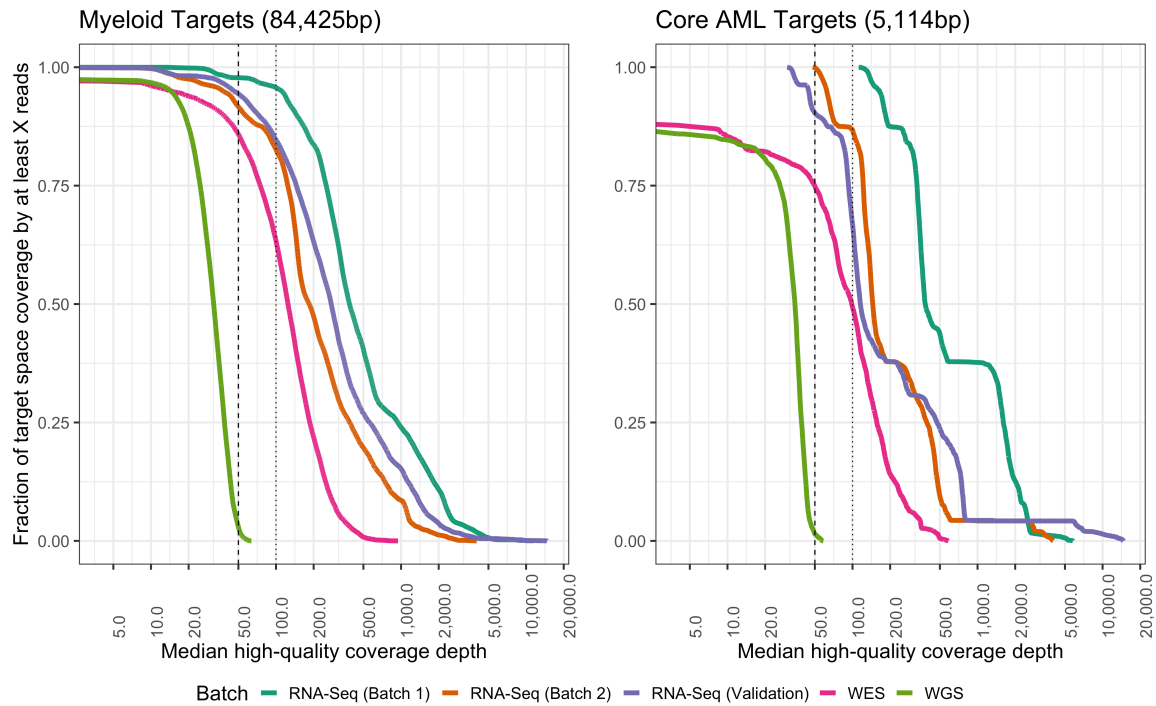

26

27 **Supplementary Figure 3.** Empirical distribution for sequence coverage depth. Myeloid  
28 panel targets (left panel) and core clinical targets (*CEBPA*, *DNMT3A*, *FLT3*, *IDH1*,  
29 *IDH2*, *KIT*, and *NPM1*) (right panel). The y-axis represents the proportion of bases  
30 covered by at least the number of reads indicated by the x-axis. Vertical dashed lines  
31 indicate coverage thresholds of 50x and 100x. Sequencing platform and study batch are  
32 indicated by line colour.

33

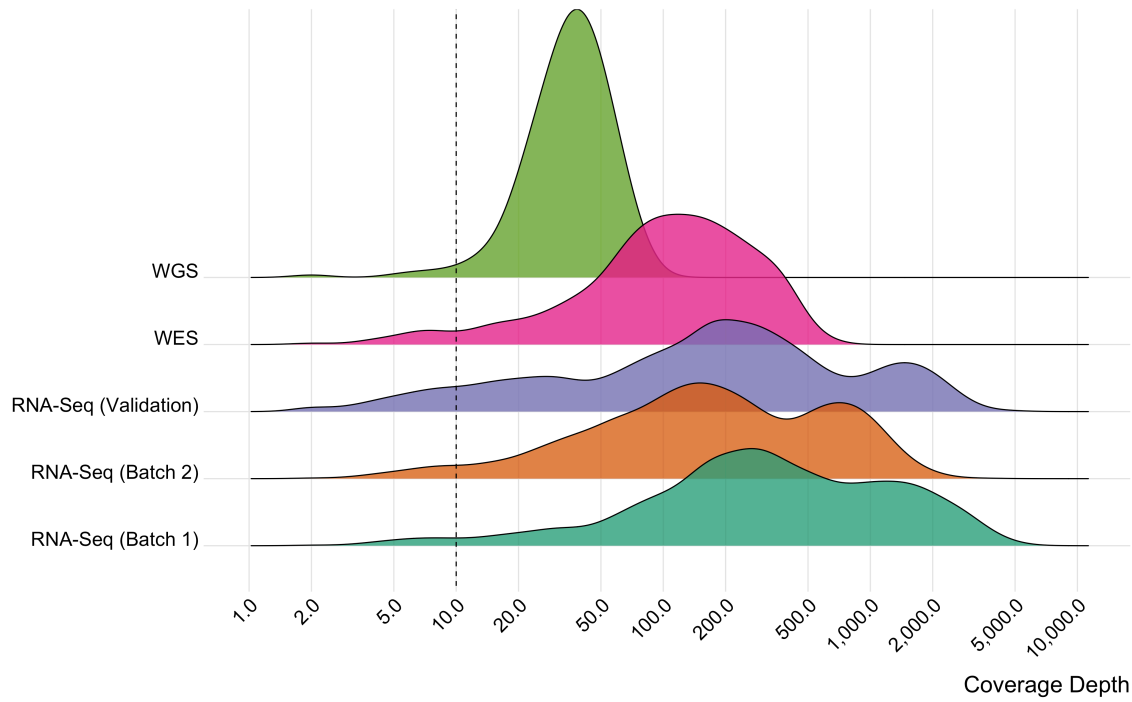

34

35 **Supplementary Figure 4.** Observed sequencing coverage depth for called variants across  
36 sequencing platforms and batches in the AML PMP cohort. Sample groups are coloured  
37 as in Supplementary Figure 3.

38

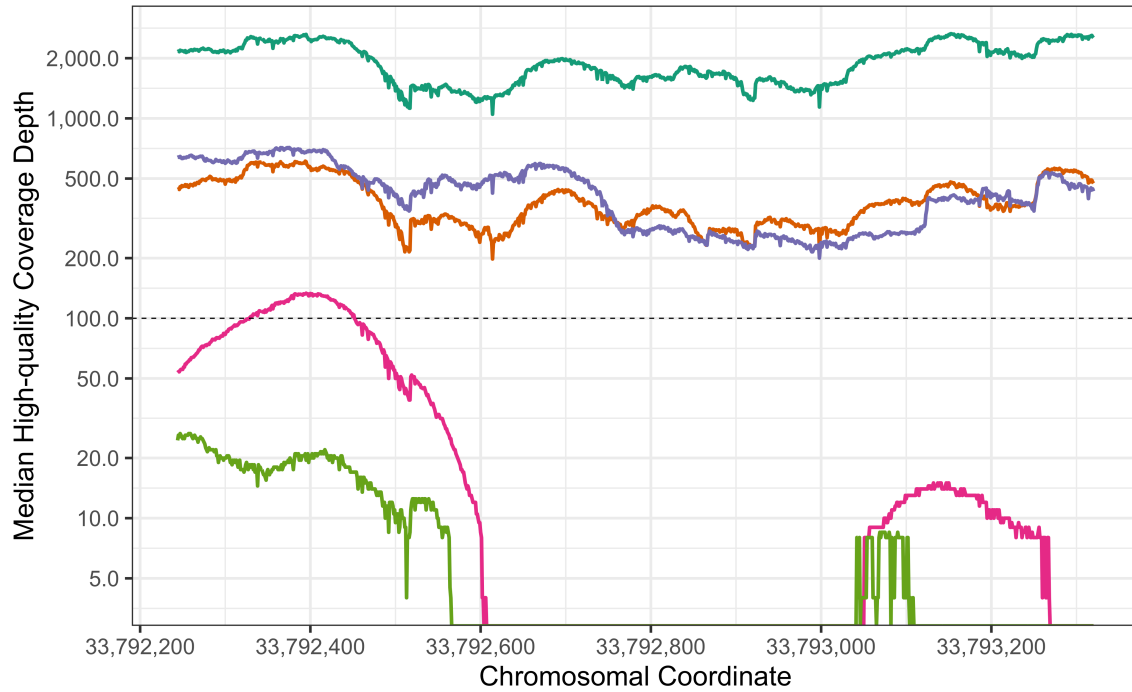

39

40 **Supplementary Figure 5.** Median high-quality sequence coverage depth over *CEBPA* in  
41 the AML PMP cohort. Each point represents the median coverage across all samples for a  
42 particular sequencing platform and batch. The 'Chromosomal Coordinate' indicates the  
43 hg19 position along chromosome 19. The line colour indicates the sequencing platform  
44 and study batch, as in Supplementary Figure 3.

45

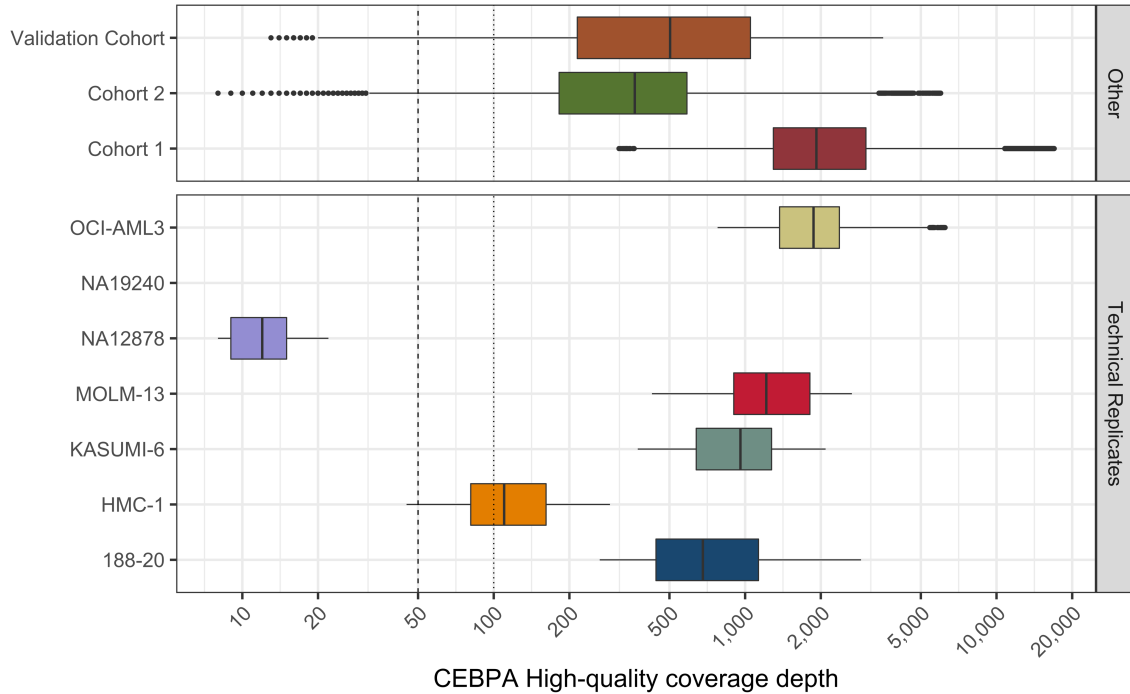

46

47 **Supplementary Figure 6.** High-quality coverage depth in *CEBPA* for technical replicate  
48 samples compared to other RNA-Seq and ssRNA-Seq samples. For each sample, high-  
49 quality sequence coverage depth at 1,077 sites in *CEBPA* were assessed. Each box plot  
50 represents pooled data across retained samples from Cohort 1 (n = 88), Cohort 2 (n = 85),  
51 and the RNA-Seq Validation Cohort (n = 28). For cell lines OCI-AML3, NA19240,  
52 NA12878, MOLM-13, KASUMI-6, HMC-1, and patient sample 188-20, three technical  
53 replicates per condition are shown. For all box plots, the median is shown with a vertical  
54 line, with the edges of the box corresponding to the first and third quartiles of the  
55 distribution, with whiskers extending to 1.5 \* the inter-quartile range of the distribution.

56

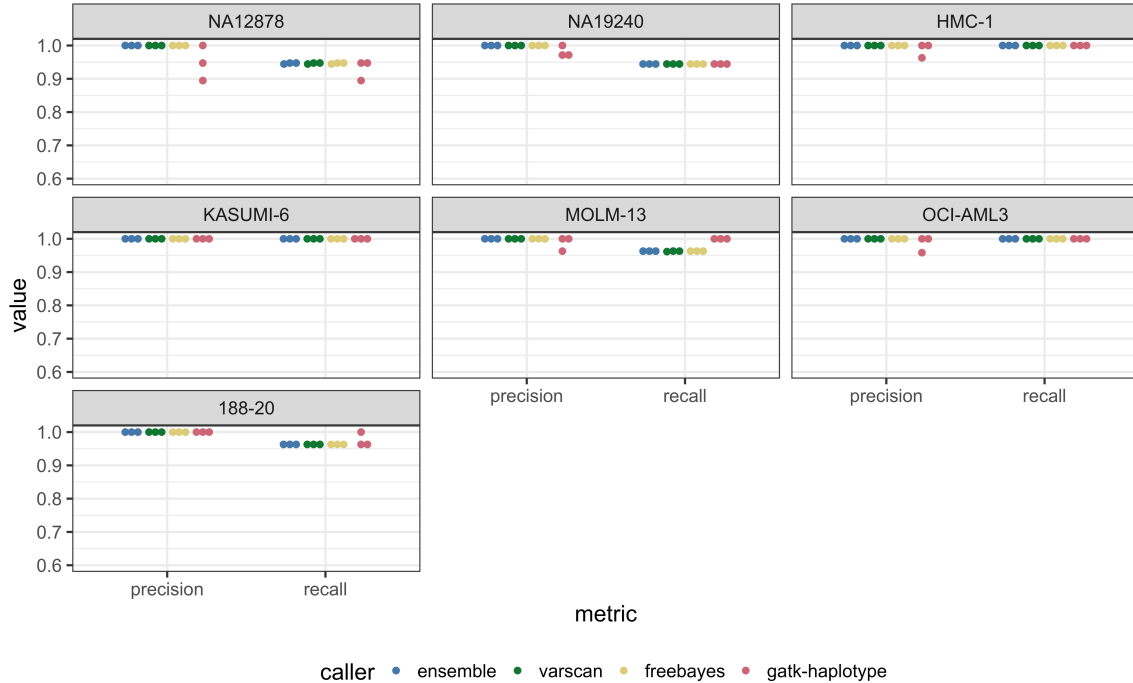

57

58 **Supplementary Figure 7.** Precision and recall by sample and variant caller for replicated  
59 RNA-Seq libraries from the AML PMP validation cohort. Precision:  $TP / (TP + FP)$ ,  
60 Recall:  $TP / (TP + FN)$ . Libraries which failed sample QC were excluded.



61

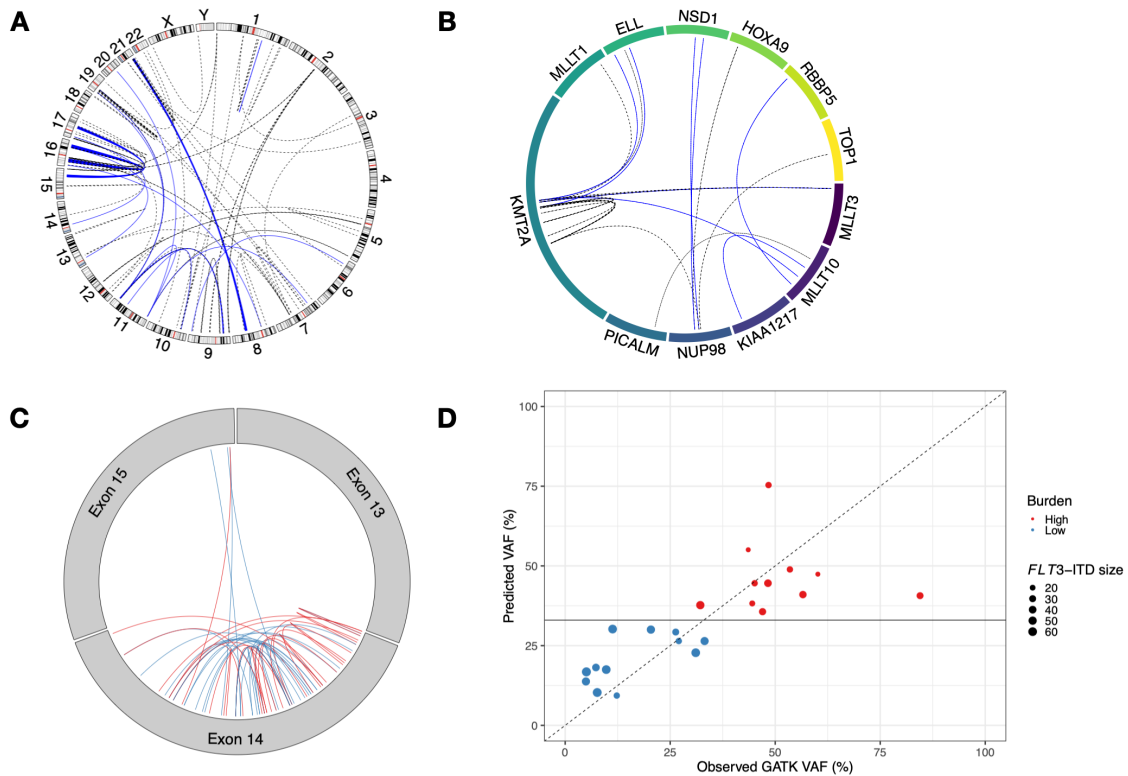

62

63 **Supplementary Figure 8.** RNA-Seq structural variation in the AML PMP exploratory  
64 cohorts. **(A)** Filtered gene fusion events detected by RNA-Seq. Each arc represents a  
65 distinct set of fusion partners, for known (blue) and novel (black) rearrangements. **(B)**  
66 Structural rearrangements involving *KMT2A*-related genes. Each gene (except *KMT2A*) is  
67 scaled to the same size, for known (blue) and novel (black) events. **(C)** Intra-gene  
68 structural variation in *FLT3*. Each circle segment represents a single exon of *FLT3*, and  
69 the zoomed panels show the coordinates of internal tandem duplication breakpoints. **(D)**  
70 Predicted VAF for *FLT3*-ITD events based on linear modelling, compared to the  
71 observed VAF from GATK HaplotypeCaller for *FLT3*-ITD events detected by both  
72 GATK and trans-ABYSS.

73

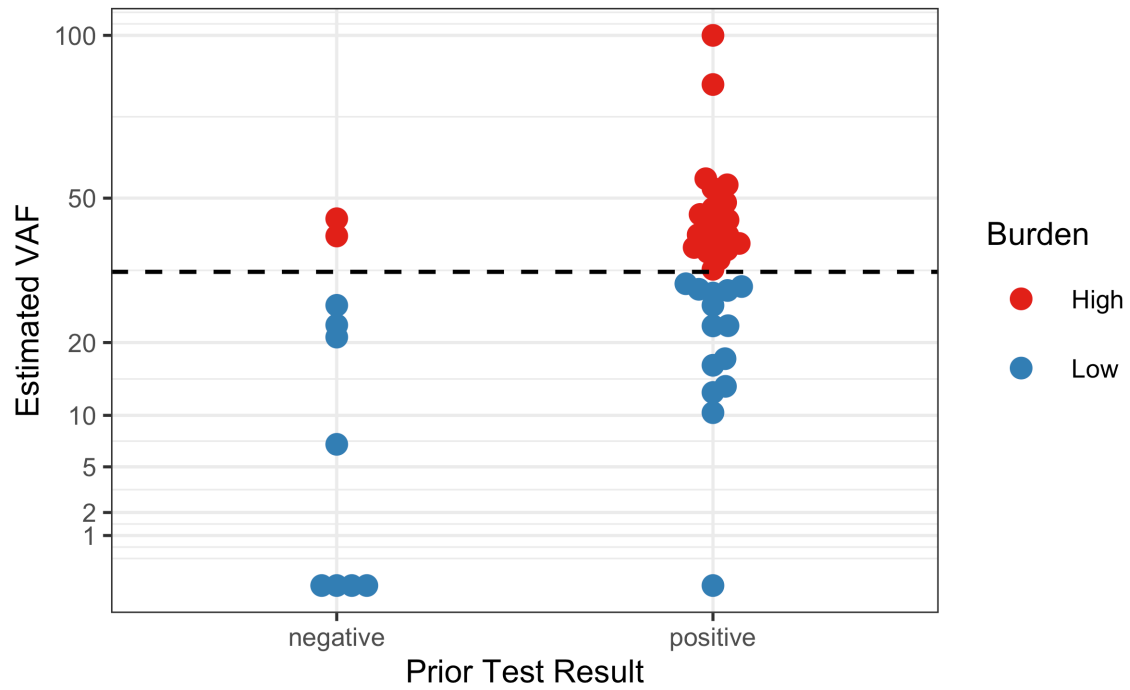

74

75 **Supplementary Figure 9.** Estimated VAF for *FLT3*-ITD events detected or not detected  
76 by prior clinical assay in the AML PMP exploratory cohorts. The horizontal dashed line  
77 indicates the estimated VAF of 33% used to discriminate high-burden from low-burden  
78 *FLT3*-ITD events.

79

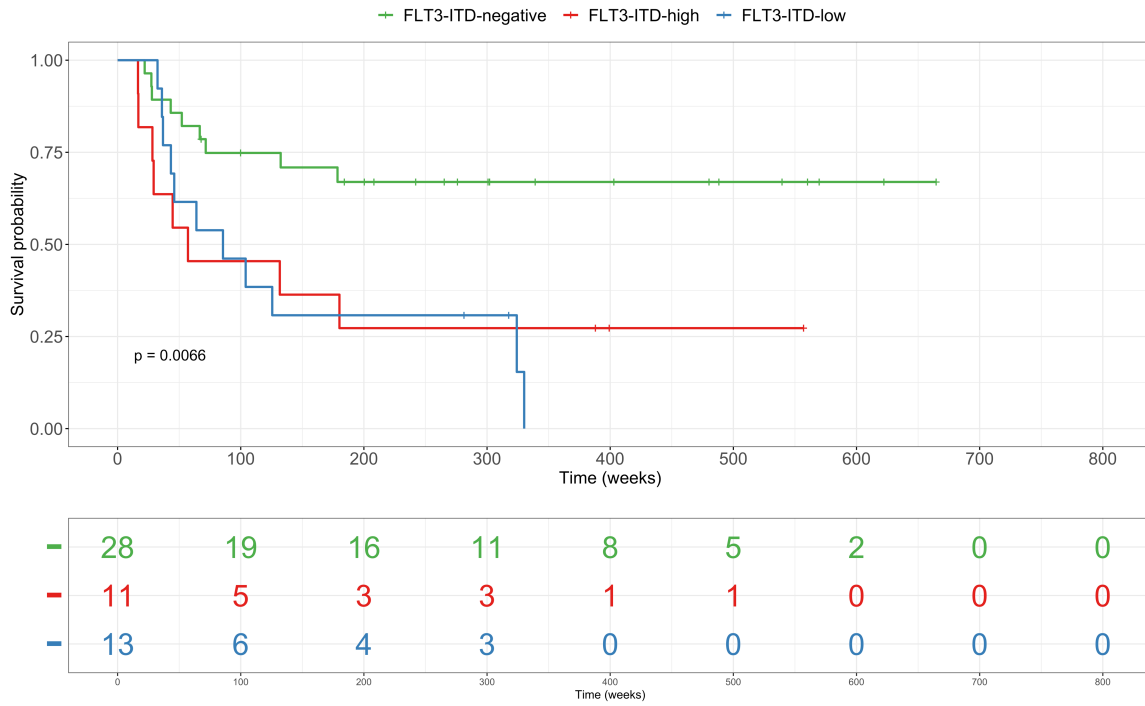

80

81 **Supplementary Figure 10.** Overall survival for normal-karyotype AML patients in the  
 82 AML PMP exploratory cohorts by *FLT3*-ITD burden, compared to patients with no  
 83 *FLT3*-ITD event.

84

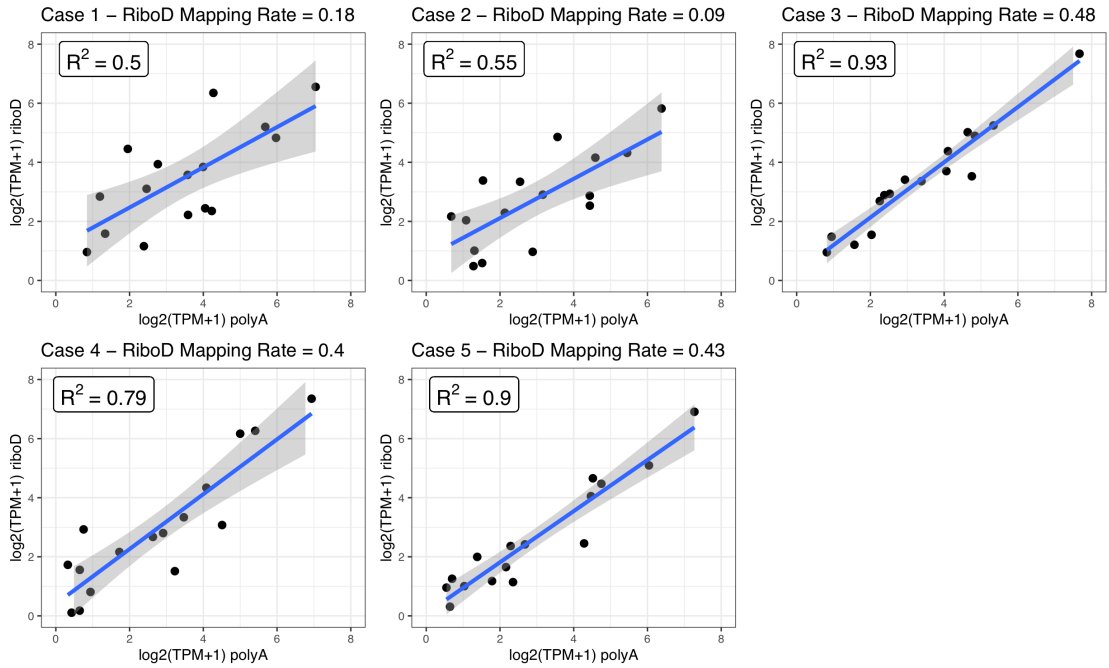

85

86 **Supplementary Figure 11.** Comparison between matched RNA-Seq libraries prepared  
87 with polyA or ribodepletion protocols. In each panel, the mapping rate for the  
88 ribodepleted library is indicated in the panel title. Each panel also indicates a linear  
89 regression of the two variables, with 95% confidence interval.

90

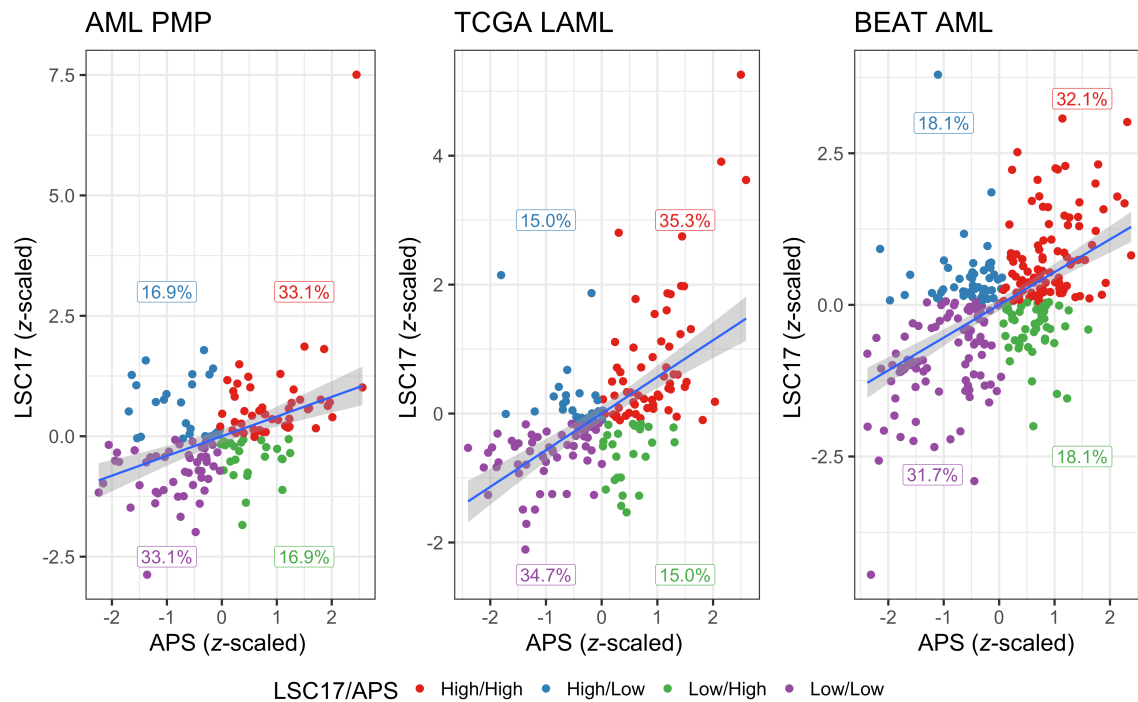

91

92 **Supplementary Figure 12.** Scaled APS and LSC17 values in the AML PMP, TCGA  
93 LAML, and BEAT AML cohorts. For each cohort, APS and LSC17 values were  
94 standardized by calculating z scores. High/low categories used for patient stratification  
95 are indicated by colour. Each panel also indicates a linear regression of the two variables  
96 (indicated with a blue line), with 95% confidence interval.

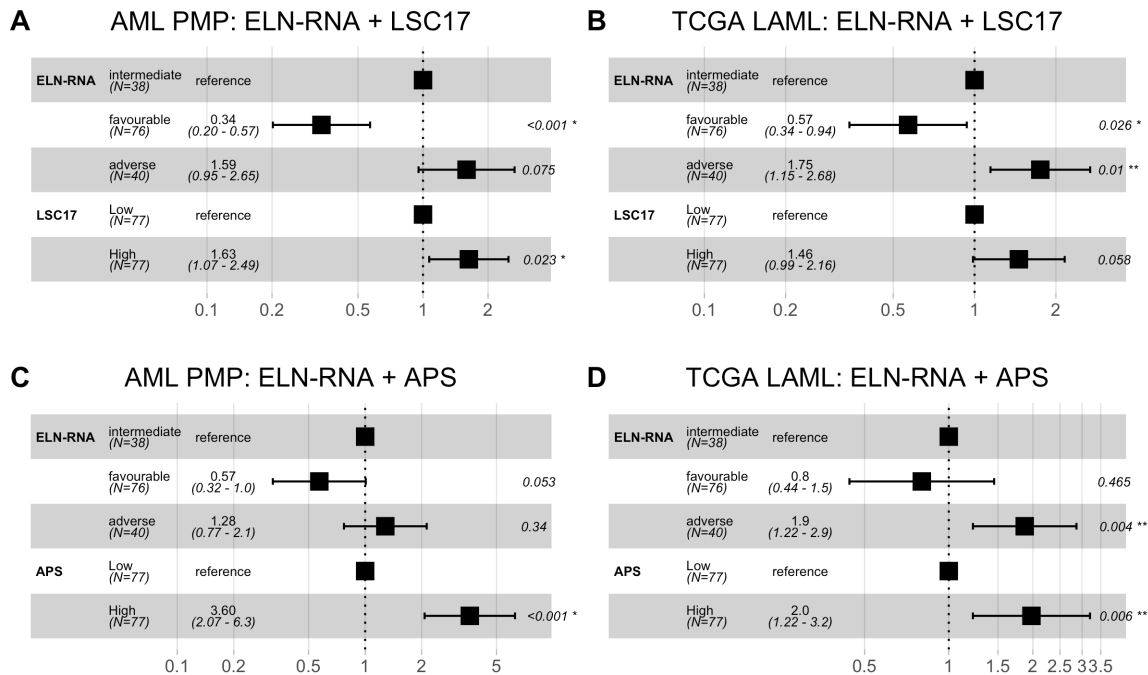

98

99 **Supplementary Figure 13.** Forest plots for multivariate survival models based on ELN-  
 100 RNA stratifications with either the LSC17 or APS gene signatures. Multivariate Cox  
 101 proportional hazards regression models were fit, modeling survival as a function of the  
 102 ELN-RNA stratification and an expression score (either LSC17 or APS). In each panel,  
 103 the hazard ratio is indicated on the x-axis, and model variables are indicated on the y-  
 104 axis. In each model, ‘Intermediate-risk’ and ‘Low’ values for the gene signatures were set  
 105 as the reference levels. In each panel, the estimated hazard ratio for a given variable is  
 106 indicated by a square, with 95% confidence intervals. *p*-values associated with each  
 107 variable are indicated at the right of each plot.

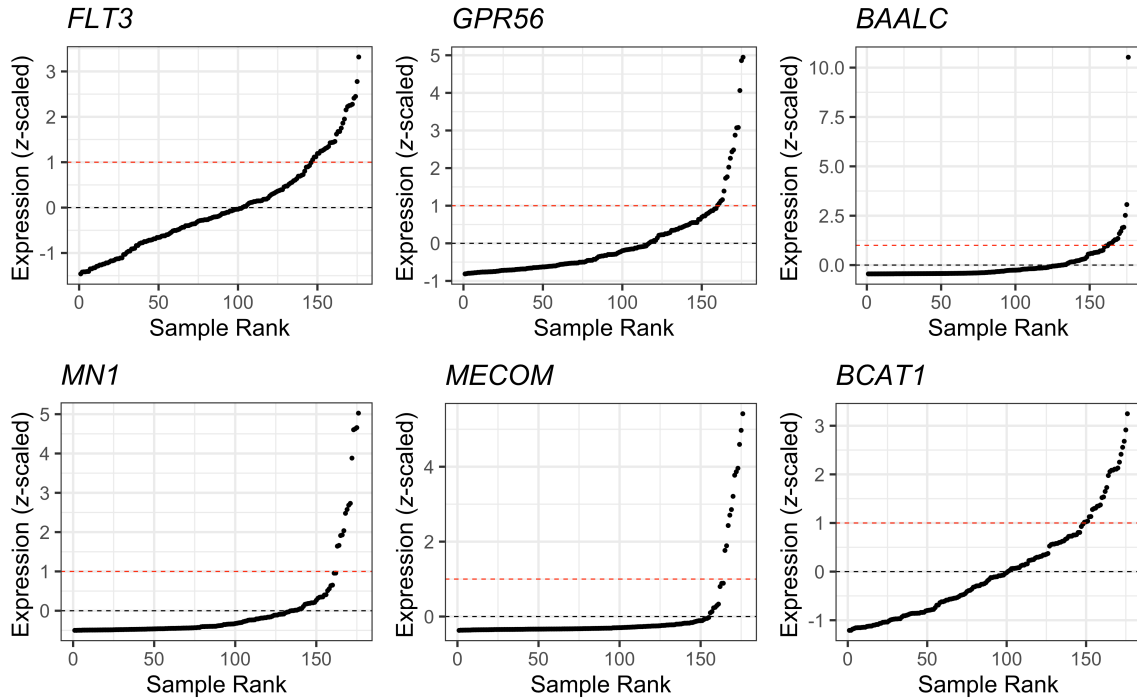

109

110 **Supplementary Figure 14.** Single-gene expression outliers. Samples are ranked by gene  
 111 expression, measured as a z score (where  $z = (x - \mu)/\sigma$ ). Black dashed line = mean  
 112 expression, red dashed line = high outlier cutoff.

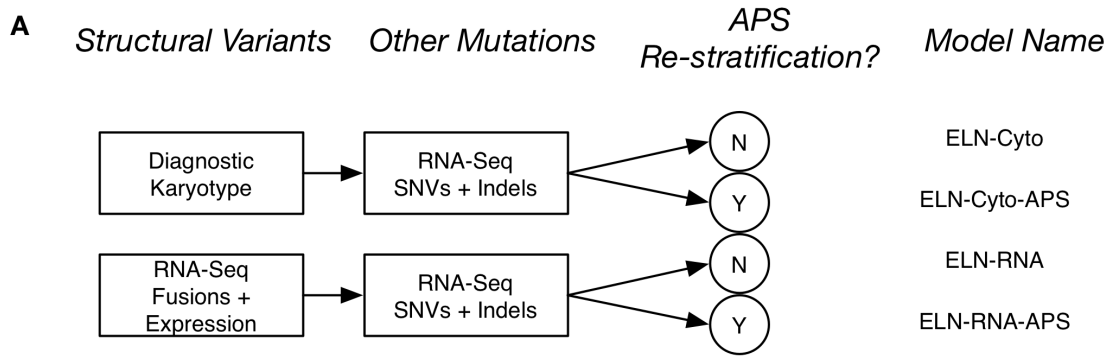

**B**

| ELN-Cyto          | ELN-RNA      | n         |
|-------------------|--------------|-----------|
| Favourable        | Favourable   | 74        |
| Intermediate      | Favourable   | 1         |
| Intermediate      | Intermediate | 25        |
| Intermediate      | Adverse      | 7         |
| Adverse           | Favourable   | 1         |
| Adverse           | Intermediate | 13        |
| Adverse           | Adverse      | 33        |
| <b>Discrepant</b> |              | <b>22</b> |

**C**

| ELN-Cyto-APS      | ELN-RNA-APS  | n        |
|-------------------|--------------|----------|
| Favourable        | Favourable   | 77       |
| Intermediate      | Intermediate | 6        |
| Intermediate      | Adverse      | 2        |
| Adverse           | Intermediate | 7        |
| Adverse           | Adverse      | 62       |
| <b>Discrepant</b> |              | <b>9</b> |

115 **Supplementary Figure 15.** Comparison of patient stratification models. (A) Schematic  
 116 overview of stratification models applied. (B) Comparison of patient stratifications  
 117 between the ELN-Cyto and ELN-RNA models. (C) Comparison of stratifications  
 118 between the ELN-Cyto-APS and ELN-RNA-APS models.



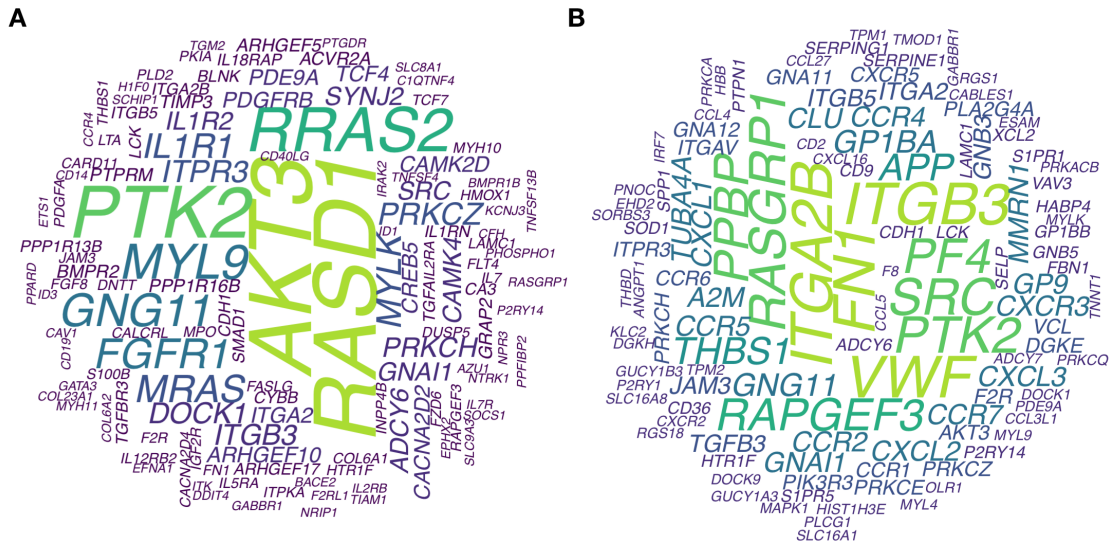

120

121 **Supplementary Figure 16.** Recurrently used molecules in enriched pathways from IPA

122 (A) and GSEA (B) pathway enrichment analyses. For each analysis, IPA molecules or

123 leading edge genes from enriched pathways were extracted and summarized, and

124 visualized as word clouds.

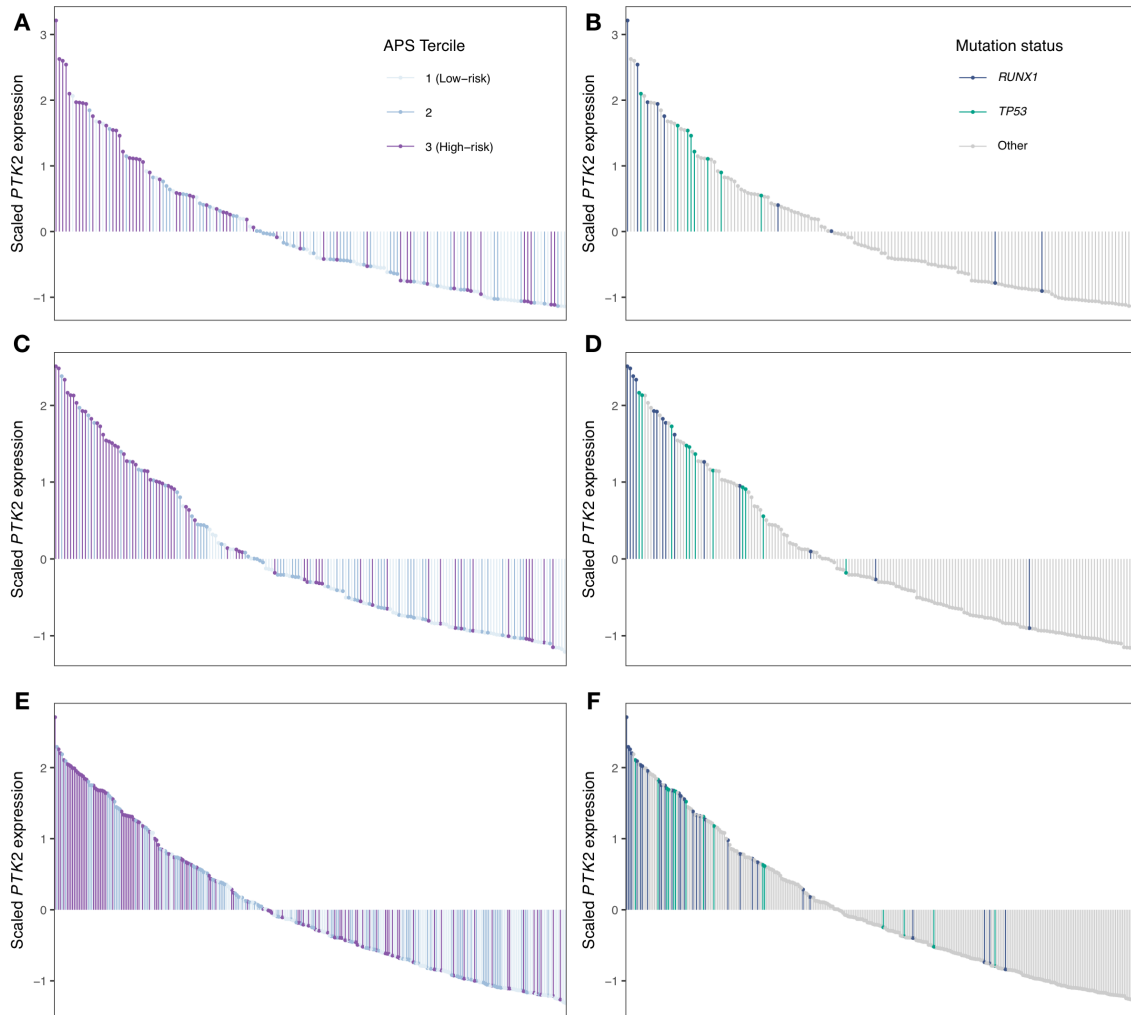

126

127 **Supplementary Figure 17.** Patients ranked by *PTK2* expression. (A, C, E) Patients are  
 128 ranked by *PTK2* expression, and coloured by APS tercile for the AML PMP (A), TCGA  
 129 LAML (C), and BEAT AML (E) cohorts. (B, D, F) Patients are ranked by *PTK2*  
 130 expression, and coloured mutation status for the AML PMP (B), TCGA LAML (D), and  
 131 BEAT AML (F) cohorts.

132

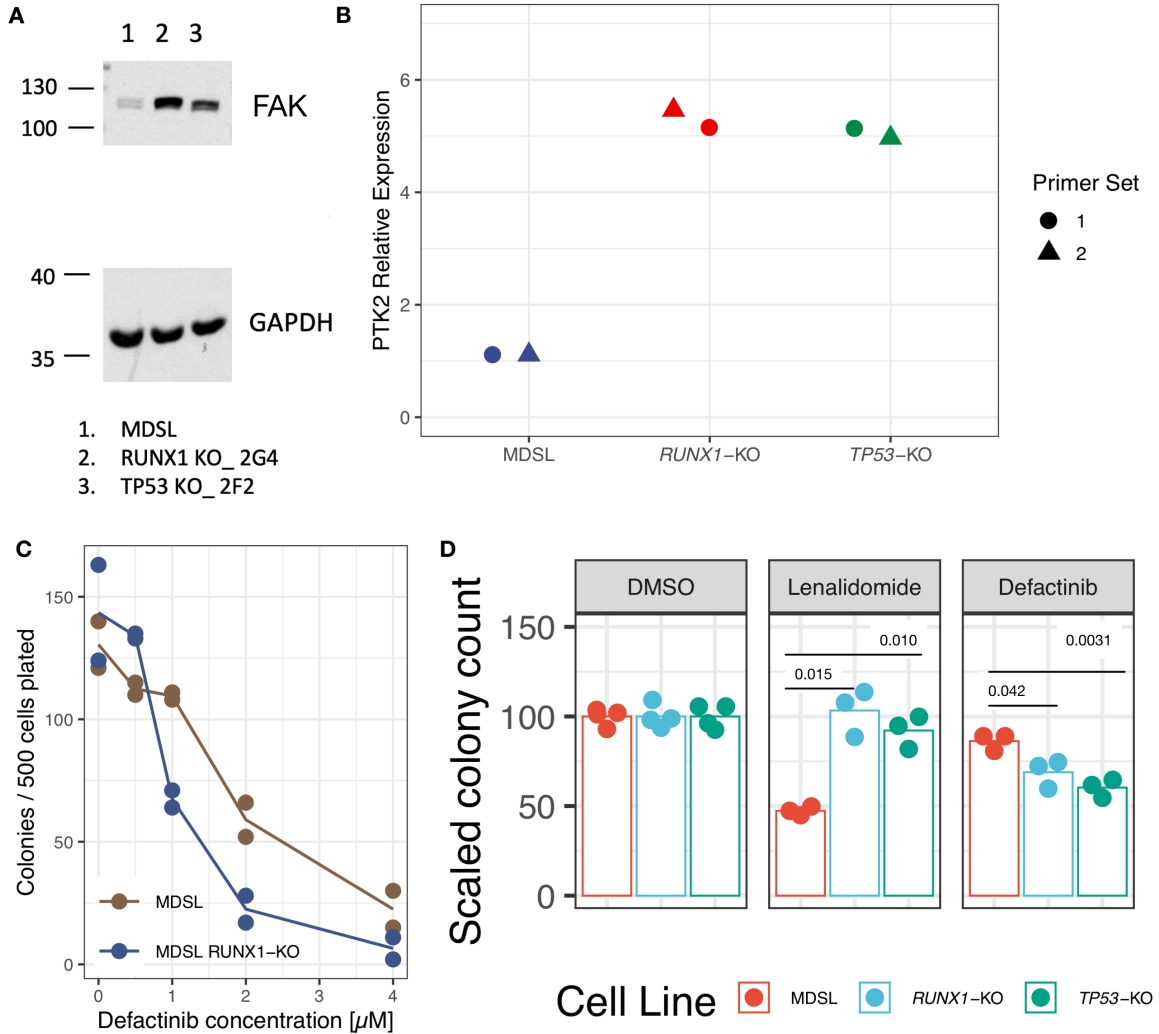

133

134 **Supplementary Figure 18.** FAK inhibition in MDSL cell line derivatives. (A) Western  
 135 blot for FAK protein expression in MDSL cell lines with *RUNX1* or *TP53* CRISPR  
 136 knockout, using cell lines generated by Martinez-Hoyer *et al.*<sup>1</sup> Each blot was repeated  
 137 twice, with similar results. (B) qPCR relative expression for *PTK2*. (C) Colony forming  
 138 cell-count dose-response curve for defactinib. (D) Colony forming cell count assays for  
 139 cells treated with DMSO, 1 $\mu$ m Lenalidomide, or 1 $\mu$ m Defactinib, with two-sided *t*-test *p*  
 140 values indicated.

141 **Supplementary References**

- 142 1. Martinez-Høyer, S. *et al.* Loss of lenalidomide-induced megakaryocytic  
143 differentiation leads to therapy resistance in del(5q) myelodysplastic syndrome.  
144 *Nature cell biology* (2020). doi:[10.1038/s41556-020-0497-9](https://doi.org/10.1038/s41556-020-0497-9)
